# Supplementary material for: Bistable Hofmann-Type FeII Spin-Crossover Two-Dimensional Polymers of 4-Alkyldisulfanylpyridine for Prospective Grafting of Monolayers on Metallic Surfaces
Source: PubMed Central journal article supplement (PMC9129067; doi:10.1021/acs.inorgchem.1c01010), 2021-05-28

## Supporting Information

### Bistable Hofmann-type Fe<sup>II</sup> spin-crossover two-dimensional polymers of 4-alkyldisulfanylpyridine for prospective grafting of monolayers on metallic surfaces

Rubén Turo-Cortés,<sup>a</sup> Francisco Javier Valverde-Muñoz,<sup>a\*</sup> Manuel Meneses-Sánchez,<sup>a</sup> M. Carmen Muñoz,<sup>b</sup> Carlos Bartual-Murgui,<sup>a</sup> José Antonio Real<sup>a\*</sup>

<sup>a</sup>Instituto de Ciencia Molecular/Departamento de Química Inorgánica, Universidad de Valencia, Catedrático Beltrán Martínez 2, 46980 Paterna, Valencia, Spain.

<sup>b</sup> Departamento de Física Aplicada, Universitat Politècnica de València, Camino de Vera S/N 46022 Valencia, Spain

Email: [francisco.valverde@uv.es](mailto:francisco.valverde@uv.es).

Email: [jose.a.real@uv.es](mailto:jose.a.real@uv.es).

Page 1- **Table S1**. Crystallographic data for **MpyS<sub>2</sub>Me** (M = Pd, Pt).

Page 2- **Table S2**. Crystallographic data for **MpyS<sub>2</sub>Et** (M = Pd, Pt).

Page 3- **Figure S1**. Thermogravimetric analysis of **MpyS<sub>2</sub>R** (M = Pd, Pt; R = Me, Et).

Page 4- **Figure S2**. Comparison of the thermal dependence of  $\Delta C_p$  and  $\partial(\chi_M T)/\partial T$  curves for **PdpyS<sub>2</sub>Me**.

Page 4- **Figure S3**. Perspective view of **PdpyS<sub>2</sub>Me** at 250K showing the perfectly flat {Fe[Pd(CN)<sub>4</sub>]<sub>n</sub>} layers and the positional disorder of the pyS<sub>2</sub>Me ligands over four positions.

Page 5- **Figure S4**. Comparison of the  $\chi_M T$  vs  $T$  plots for {Fe(pyridine)<sub>2</sub>[Pt(CN)<sub>4</sub>]} obtained by direct precipitation and by slow diffusion as single crystals.

**Table S1.** Crystal data for **MpyS<sub>2</sub>Me** (M = Pd, Pt).

|                                                             | <b>PdpyS<sub>2</sub>Me_120K</b>                                    | <b>PdpyS<sub>2</sub>Me_250K</b> | <b>PtPyS<sub>2</sub>Me_120K</b>                                    | <b>PtPyS<sub>2</sub>Me_250K</b>                                   |
|-------------------------------------------------------------|--------------------------------------------------------------------|---------------------------------|--------------------------------------------------------------------|-------------------------------------------------------------------|
| Empirical formula                                           | C <sub>16</sub> H <sub>14</sub> N <sub>6</sub> S <sub>4</sub> PdFe |                                 | C <sub>16</sub> H <sub>14</sub> N <sub>6</sub> S <sub>4</sub> PtFe | C <sub>16</sub> H <sub>8</sub> N <sub>6</sub> S <sub>4</sub> PtFe |
| <i>Mr</i>                                                   | 580.82                                                             |                                 | 669.51                                                             | 663.46                                                            |
| Crystal system                                              | triclinic                                                          |                                 |                                                                    |                                                                   |
| Space group                                                 | <i>P</i> -1                                                        |                                 |                                                                    |                                                                   |
| <i>a</i> (Å)                                                | 7.189(3)                                                           | 7.4283(4)                       | 6.9945(8)                                                          | 7.2382(8)                                                         |
| <i>b</i> (Å)                                                | 7.192(3)                                                           | 7.4310(4)                       | 7.343(2)                                                           | 7.591(2)                                                          |
| <i>c</i> (Å)                                                | 11.881(5)                                                          | 12.1476(8)                      | 11.065(2)                                                          | 11.372(3)                                                         |
| $\alpha$ (°)                                                | 72.460(19)                                                         | 107.823(6)                      | 78.58(2)                                                           | 105.36(2)                                                         |
| $\beta$ (°)                                                 | 72.419(14)                                                         | 107.831(5)                      | 73.11(2)                                                           | 101.31(2)                                                         |
| $\gamma$ (°)                                                | 89.946(13)                                                         | 89.990(4)                       | 89.902(13)                                                         | 90.05(2)                                                          |
| <i>V</i> (Å <sup>3</sup> )                                  | 555.6(4)                                                           | 604.45(7)                       | 532.1(2)                                                           | 589.9(2)                                                          |
| <i>Z</i>                                                    | 1                                                                  |                                 |                                                                    |                                                                   |
| <i>T</i> (K)                                                | 120                                                                | 250                             | 120                                                                | 250                                                               |
| <i>D<sub>c</sub></i><br>(mg cm <sup>-3</sup> )              | 1.736                                                              | 1.596                           | 2.089                                                              | 1.867                                                             |
| <i>F</i> (000)                                              | 288                                                                |                                 | 320                                                                | 314                                                               |
| $\mu$ (Mo-K $\alpha$ ) (mm <sup>-1</sup> )                  | 1.852                                                              | 1.702                           | 7.655                                                              | 6.903                                                             |
| Crystal size (mm)                                           | 0.01x0.08x0.08                                                     |                                 | 0.05x0.5x0.5                                                       |                                                                   |
| No. of total reflections                                    | 2764                                                               | 2433                            | 2892                                                               | 2378                                                              |
| No. of reflections<br>[ <i>I</i> > 2 $\sigma$ ( <i>I</i> )] | 2685                                                               | 2186                            | 2669                                                               | 1907                                                              |
| <i>R</i> [ <i>I</i> > 2 $\sigma$ ( <i>I</i> )]              | 0.0341                                                             | 0.0462                          | 0.1234                                                             | 0.1195                                                            |
| <i>wR</i> [ <i>I</i> > 2 $\sigma$ ( <i>I</i> )]             | 0.0838                                                             | 0.1013                          | 0.3023                                                             | 0.2940                                                            |
| <i>S</i>                                                    | 1.109                                                              | 1.051                           | 1.265                                                              | 1.154                                                             |

$$R = \sum ||F_o| - |F_c|| / \sum |F_o|; wR = [\sum [w(F_o^2 - F_c^2)^2] / \sum [w(F_o^2)^2]]^{1/2}.$$

$$w = 1 / [\sigma^2(F_o^2) + (m P)^2 + n P] \text{ where } P = (F_o^2 + 2F_c^2) / 3;$$

$$m = 0.0393 \text{ (1)}, 0.0502 \text{ (2)}, 0.2000 \text{ (3)}, \text{ and } 0.2000 \text{ (4)};$$

$$n = 0.7715 \text{ (1)}, 0.0000 \text{ (2)}, 0.0000 \text{ (3)}, \text{ and } 0.0000 \text{ (4)}$$

**Table S2.** Crystal data for **MpyS<sub>2</sub>Et** (M = Pd, Pt).

|                                                             | <b>PdpyS<sub>2</sub>Et_100K</b>                                    | <b>PdpyS<sub>2</sub>Et_250K</b>                                    | <b>PtptyS<sub>2</sub>Et_100K</b>                                   | <b>PtptyS<sub>2</sub>Et_250K</b>                                   |
|-------------------------------------------------------------|--------------------------------------------------------------------|--------------------------------------------------------------------|--------------------------------------------------------------------|--------------------------------------------------------------------|
| Empirical formula                                           | C <sub>18</sub> H <sub>18</sub> N <sub>6</sub> S <sub>4</sub> PdFe | C <sub>18</sub> H <sub>18</sub> N <sub>6</sub> S <sub>4</sub> PdFe | C <sub>18</sub> H <sub>18</sub> N <sub>6</sub> S <sub>4</sub> PtFe | C <sub>18</sub> H <sub>18</sub> N <sub>6</sub> S <sub>4</sub> PtFe |
| <i>Mr</i>                                                   | 608.87                                                             | 608.87                                                             | 697.56                                                             | 697.56                                                             |
| Crystal system                                              | monoclinic                                                         | monoclinic                                                         | monoclinic                                                         | monoclinic                                                         |
| Space group                                                 | <i>I2/m</i>                                                        | <i>C2/m</i>                                                        | <i>I2/m</i>                                                        | <i>C2/m</i>                                                        |
| <i>a</i> (Å)                                                | 13.8182(8)                                                         | 23.9683(14)                                                        | 13.8437(4)                                                         | 24.0228(10)                                                        |
| <i>b</i> (Å)                                                | 7.3599(4)                                                          | 7.6791(2)                                                          | 7.3489(2)                                                          | 7.6448(2)                                                          |
| <i>c</i> (Å)                                                | 23.201(2)                                                          | 13.8679(7)                                                         | 23.3286(8)                                                         | 13.9959(5)                                                         |
| $\beta$ (°)                                                 | 106.079(7)                                                         | 106.053(5)                                                         | 106.218(3)                                                         | 106.485(4)                                                         |
| <i>V</i> (Å <sup>3</sup> )                                  | 2267.2(3)                                                          | 2452.9(2)                                                          | 2278.91(12)                                                        | 2464.7(2)                                                          |
| <i>Z</i>                                                    | 4                                                                  |                                                                    | 4                                                                  |                                                                    |
| <i>T</i> (K)                                                | 100                                                                | 250                                                                | 100                                                                | 250                                                                |
| <i>D<sub>c</sub></i><br>(mg cm <sup>-3</sup> )              | 1.784                                                              | 1.649                                                              | 2.033                                                              | 1.880                                                              |
| <i>F</i> (000)                                              | 1216                                                               | 1216                                                               | 1344                                                               | 1344                                                               |
| $\mu$ (Mo-K $\alpha$ ) (mm <sup>-1</sup> )                  | 1.820                                                              | 1.682                                                              | 7.153                                                              | 6.614                                                              |
| Crystal size (mm)                                           | 0.1x0.5x0.5                                                        |                                                                    | 0.1x0.7x0.7                                                        |                                                                    |
| No. of total reflections                                    | 3166                                                               | 3398                                                               | 3272                                                               | 3489                                                               |
| No. of reflections<br>[ <i>I</i> > 2 $\sigma$ ( <i>I</i> )] | 2179                                                               | 2052                                                               | 2611                                                               | 2588                                                               |
| <i>R</i> [ <i>I</i> > 2 $\sigma$ ( <i>I</i> )]              | 0.0520                                                             | 0.0707                                                             | 0.0332                                                             | 0.0369                                                             |
| <i>wR</i> [ <i>I</i> > 2 $\sigma$ ( <i>I</i> )]             | 0.0862                                                             | 0.1355                                                             | 0.0832                                                             | 0.0887                                                             |
| <i>S</i>                                                    | 1.035                                                              | 1.035                                                              | 1.119                                                              | 1.064                                                              |

$$R = \frac{\sum ||F_o| - |F_c||}{\sum |F_o|}; wR = \left[ \frac{\sum [w(F_o^2 - F_c^2)^2]}{\sum [w(F_o^2)^2]} \right]^{1/2}.$$

$$w = 1 / [\sigma^2(F_o^2) + (m P)^2 + n P] \text{ where } P = (F_o^2 + 2F_c^2) / 3;$$

$$m = 0.0275 \text{ (1), } 0.0430 \text{ (2), } 0.0346 \text{ (3), and } 0.0422 \text{ (4);}$$

$$n = 0.0000 \text{ (1), } 23.1512 \text{ (2), } 38.7639 \text{ (3), and } 11.5730 \text{ (4)}$$

**Figure S1.** Thermogravimetric analysis of  $\text{MpyS}_2\text{R}$  (M = Pd, Pt; R = Me, Et).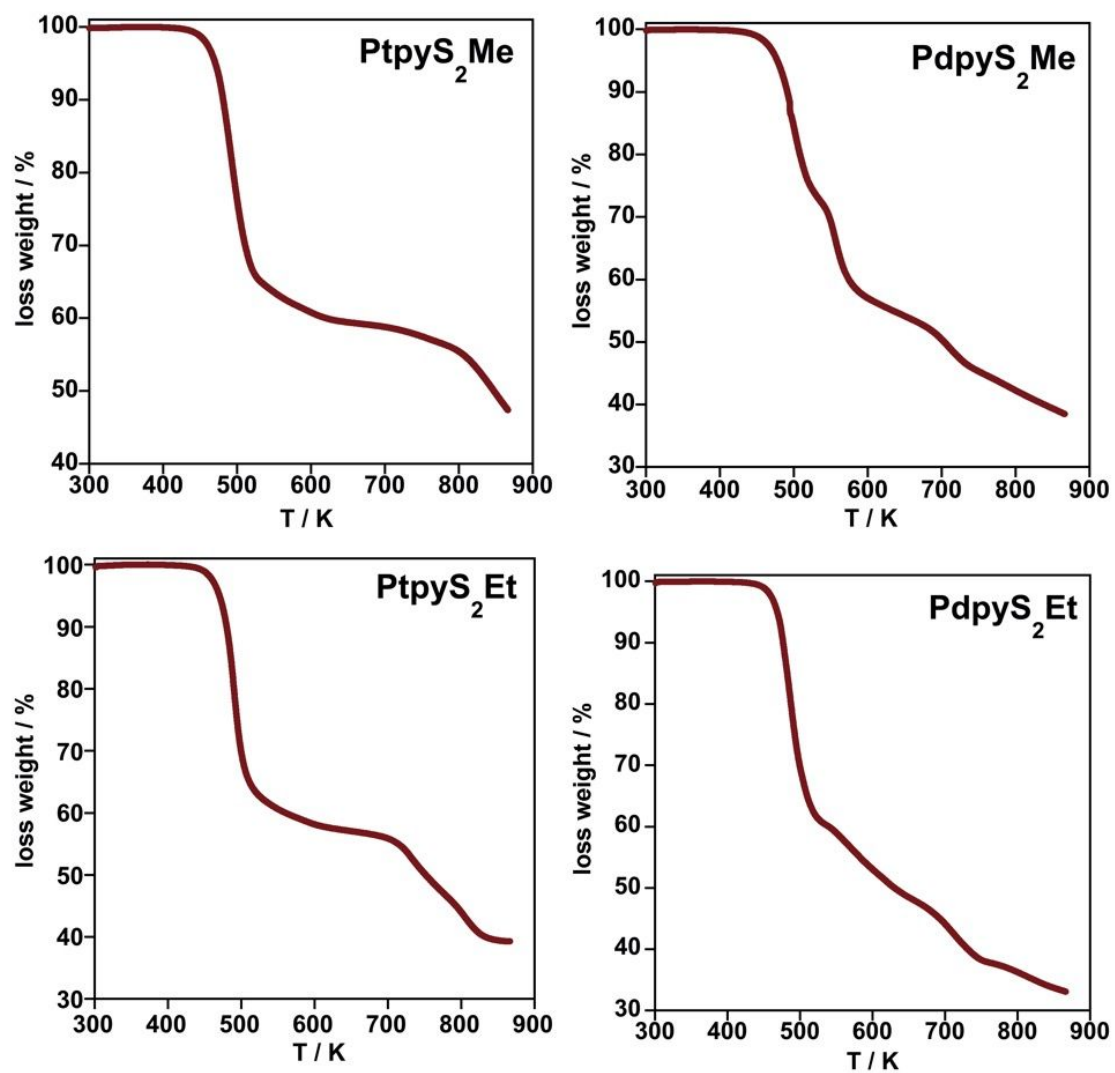

**Figure S2.** Comparison of the thermal dependence of  $\Delta C_p$  and  $\partial(\chi_M T)/\partial T$  curves for **PdpyS<sub>2</sub>Me**. Note the excellent match between both curves and the lack in the  $\Delta C_p$  vs T plot of the peak below 150 K due to experimental constraints.

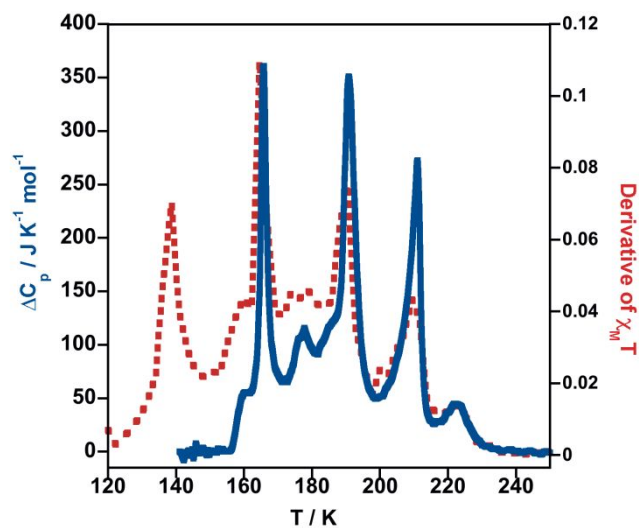

**Figure S3.** Perspective view of **PdpyS<sub>2</sub>Me** at 250K showing the perfectly flat  $\{Fe[Pd(CN)_4]_n\}$  layers and the positional disorder of the pyS<sub>2</sub>Me ligands over four positions.

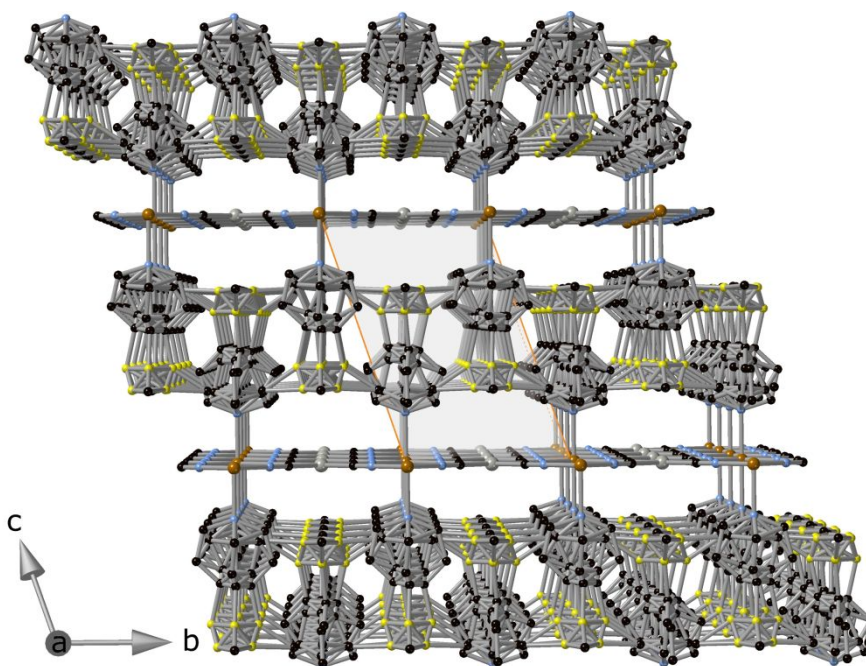

**Figure S4.** Comparison of the  $\chi_M T$  vs  $T$  plots for  $\{\text{Fe}(\text{pyridine})_2[\text{Pt}(\text{CN})_4]\}$  obtained by direct precipitation as a microcrystalline powder (blue) and by liquid-liquid slow diffusion as single crystals (red).

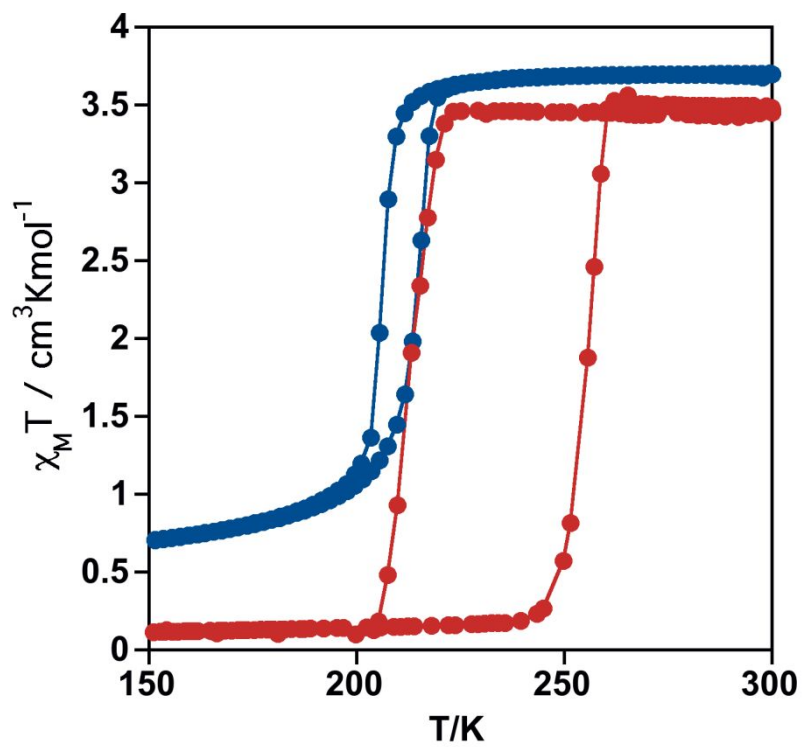

Supplement: ic1c01010_si_001.pdf [file ic1c01010_si_001.pdf]
